# Supplementary material
Source: PubMed Central journal article supplement (PMC1458939)
Supplement: pnas_0601989103_4.pdf [file pnas_0601989103_4.pdf]

**Table 2.** List of MTA1 chromatin targets identified in the screen

| <b>Targets identified</b> | <b>Gene name</b>                             | <b>Location</b> | <b>Size of fragment</b> |
|---------------------------|----------------------------------------------|-----------------|-------------------------|
| <b>M8</b>                 | <b>Hypothetical LOC401522</b>                | <b>9p11.2</b>   | <b>650 bp</b>           |
| <b>M19</b>                | <b>Centaurin, delta 1</b>                    | <b>4p14</b>     | <b>2.4 Kb</b>           |
| <b>M25</b>                | <b>KIAA0872</b>                              | <b>16q23.1</b>  | <b>800 bp</b>           |
| <b>M30</b>                | <b>Hypothetical protein FLJ23790</b>         | <b>1q21.2</b>   | <b>700 bp</b>           |
| <b>M63</b>                | <b>Sprouty homolog 2</b>                     | <b>13q22.2</b>  | <b>100 bp</b>           |
| <b>M88</b>                | <b>Matrix metalloproteinase 16</b>           | <b>8q21</b>     | <b>200 bp</b>           |
| <b>M70</b>                | <b>Breast Carcinoma Amplified sequence 3</b> | <b>17q23</b>    | <b>600 bp</b>           |
