# Supplementary material
Source: PubMed Central journal article supplement (PMC1458939)
Supplement: pnas_0601989103_5.pdf [file pnas_0601989103_5.pdf]

**Table 3.** Distribution of BCAS3 and MTA1 in tumor material and relation to other clinico-pathological parameters

| Variable                                            | BCAS3 cytoplasmic staining |                |                |                     | MTA1 nuclear staining |                |                |                    |
|-----------------------------------------------------|----------------------------|----------------|----------------|---------------------|-----------------------|----------------|----------------|--------------------|
|                                                     | 0 - 1<br>(n=144)           | 2<br>(n=147)   | 3-4<br>(n=89)  | P<br>value*         | 0-1<br>(n=126)        | 2<br>(n=138)   | 3-4<br>(n=100) | P<br>value*        |
| <i>Age</i><br>Years, median (range)                 | 45 (27-55)                 | 45 (26-57)     | 44 (30-55)     | 0.400 <sup>†</sup>  | 45 (31-57)            | 44 (26-57)     | 44 (30-55)     | 0.724 <sup>‡</sup> |
| <i>Tumor size</i><br>?20 mm<br>21+ mm               | 56<br>88                   | 54<br>93       | 30<br>58       | 0.466               | 41<br>85              | 49<br>88       | 44<br>56       | 0.0084             |
| <i>Tumor type</i><br>Ductal<br>Lobular<br>Medullary | 121<br>16<br>2             | 129<br>5<br>7  | 68<br>6<br>13  | <0.001 <sup>†</sup> | 105<br>9<br>8         | 124<br>3<br>8  | 75<br>13<br>5  | 0.021 <sup>‡</sup> |
| <i>Lymph node status</i><br>N0<br>N+                | 33<br>109                  | 40<br>107      | 29<br>60       | 0.075               | 39<br>86              | 33<br>104      | 26<br>74       | 0.408              |
| <i>Ki67</i><br>1<br>2<br>3                          | 66<br>38<br>24             | 64<br>38<br>32 | 17<br>18<br>37 | <0.001              | 64<br>30<br>20        | 44<br>32<br>41 | 31<br>29<br>26 | 0.002              |

\*Correlations were calculated using Spearman's  $\rho$  unless other specified.

<sup>†</sup>Kruskal Wallis test for comparison of medians, <sup>‡</sup> Pearson  $\chi^2$ .
