# Supplementary material
Source: PubMed Central journal article supplement (PMC1458939)
Supplement: pnas_0601989103_6.pdf [file pnas_0601989103_6.pdf]

# Table 4. List of primers used in the study

|                                                                                                             | ChIP-PCR primers                                                                                                                                                                               |
|-------------------------------------------------------------------------------------------------------------|------------------------------------------------------------------------------------------------------------------------------------------------------------------------------------------------|
| BCAS3 F<br>BCAS3 R<br>UBCAS3F<br>UBCAS3R<br>DBCAS3F<br>DBCAS3R                                              | CCTGAAGATGCCTCCTAGACA<br>CCCTTCCCTCCCTCATTATT<br>AGGAGATCCAGATGGCTCAG<br>GCAGCATTTTCTTTTAGAGATGG<br>ATGCCTGTAATCCCAGTGCT<br>TGCATGGTTTCAGCCAACTA                                               |
|                                                                                                             | RT-PCR primers                                                                                                                                                                                 |
| BCAS3 F<br>BCAS3 R<br>GAPDH F<br>GAPDH R<br>Actin F<br>Actin R<br>MTA1 F<br>MTA1 R                          | GAAGAATGGCTTTCCAGGT<br>GTCACGCTCCTGTCAAAGG<br>CCATCTTCCAGGAGCGAGATC<br>TGGTTCACACCCATGACGAA<br>GGACTTCGAGCAAGAGATGG<br>ACATCTGCTGGAAGGTGGAC<br>AAGACCACCGACAGATACGTGC<br>TGGCCTCTCTCCATCTAACCG |
|                                                                                                             | Mutagenesis primers                                                                                                                                                                            |
| BCAS3 enhancer sequence<br>½ ERE1 F<br>½ ERE1 R<br>½ ERE2 F<br>½ ERE2 R<br><br>MTA1 K626A F<br>MTA1 K626A R | GCAGCTGTGCACTGTACCTATTTACC<br>GGTAATAGGTACAGTGCACAGCTGC<br>CCTATTACCTTTCAGTACATTAAAGCC<br>GGCTTTAATG TACTGAAAGG TAAATAGG<br><br>CTCCTGCTCAACGGGGCGTCTACCCCACC<br>GGTGGGGTAGGACGCCCCGTGAGCAGGAG |
|                                                                                                             | EMSA probes                                                                                                                                                                                    |
| BCAS3 enhancer sequence<br>Oligo 1 F<br>Oligo 1 R<br>Oligo 2 F<br>Oligo 2 R                                 | TCCTTAGCAGCTGTGCACTGACCCTATTTACC<br>GAAGGTAAATAGGGTCACTCACAGCTGCTAA<br>TTTACCTTTCAGGTCATTAAAGCCACAGAA<br>AAGTTCTGTGGCTTTAATGACCTGAAAGGT                                                        |
