# Supplementary material
Source: PubMed Central journal article supplement (PMC1458939)

**A**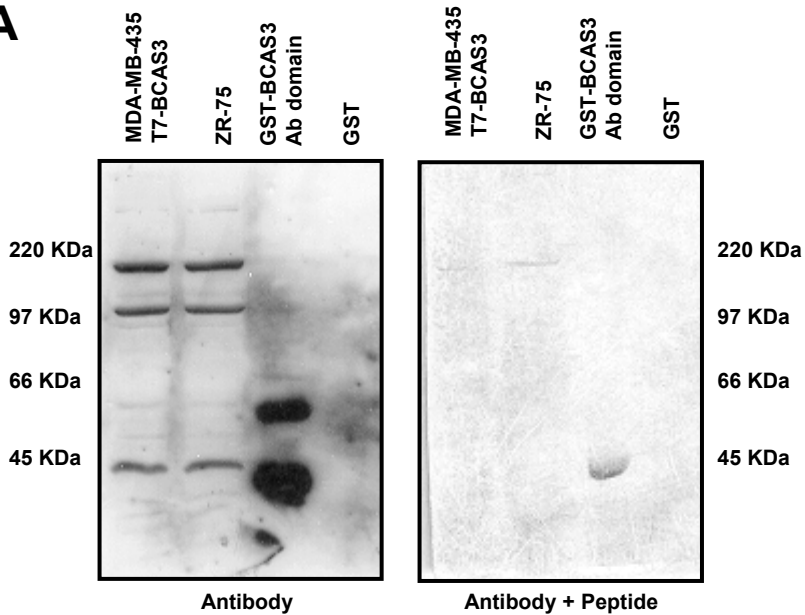**B**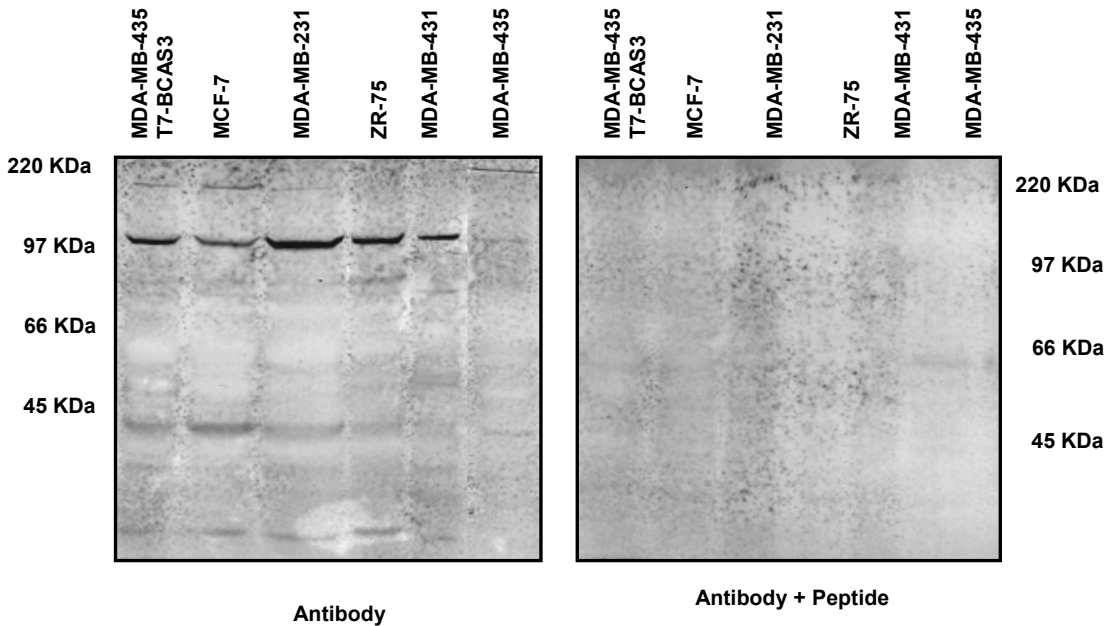

Supplement: pnas_0601989103_1.pdf [file pnas_0601989103_1.pdf]

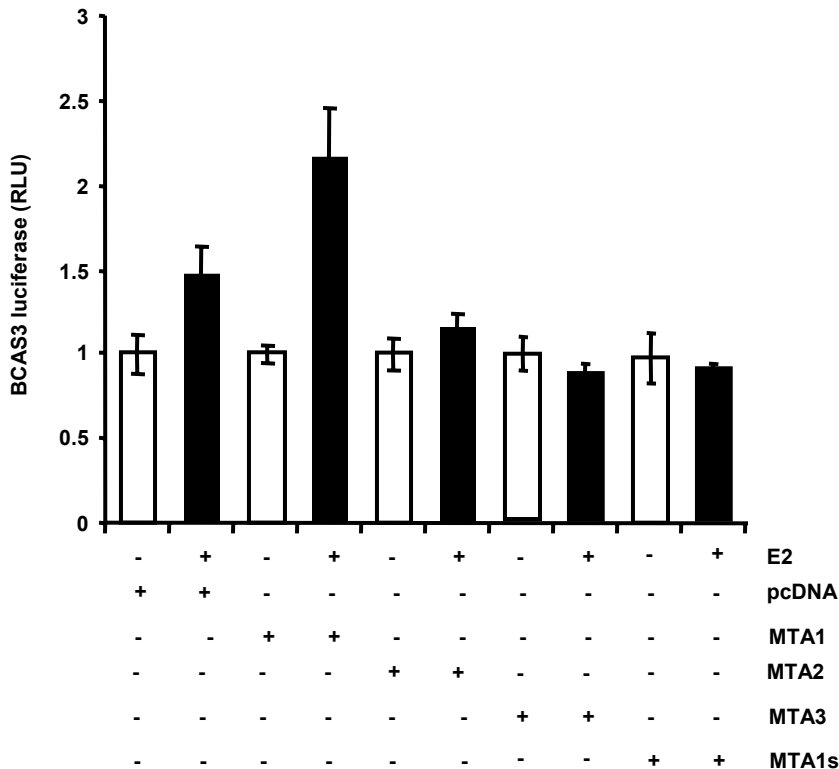

Supplement: pnas_0601989103_2.pdf [file pnas_0601989103_2.pdf]

**BCAS3****MTA1****Normal**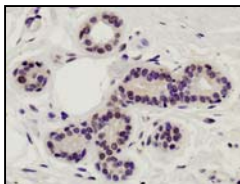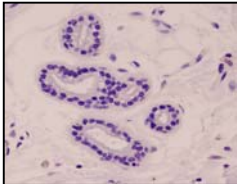**Tumor**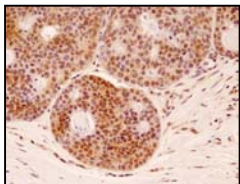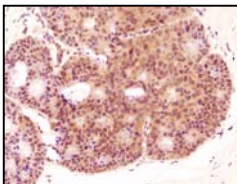**Tumor**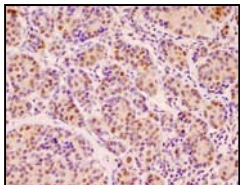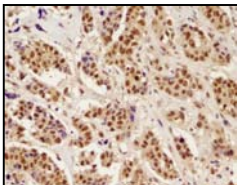**Tumor+peptide****1<sup>st</sup> Ab control**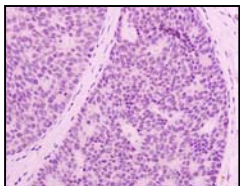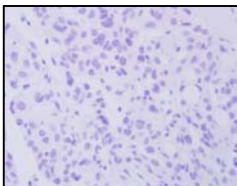

Supplement: pnas_0601989103_3.pdf [file pnas_0601989103_3.pdf]
